# Supplementary material
Source: Springer Nature journal article supplement (https://www.springermedizin.de/resource/supplementary/12888_2009_599_MOESM1_ESM.pdf/9483700)
Supplement: MOESM1 [file 9483700]

CRIS - Search - Microsoft Internet Explorer

File Edit View Favorites Tools Help

Back Forward Stop Home Search Favorites

Address http://10.16.32.139/CRIS/user/searchForm

Save as Alert Save Search Export Results

Total Results: 1297

Displaying results 1-20 of 1297 found

Results: 1-20 21-40 41-60 61-80 81-100 101-120 121-140 141-160 161-180 181-200 Next

| BRC_ID   | Ethnicity     | cPAGe06_0 | eEVA04_0   | eEVCo18_0                                                                                                                                                                                                                                                                                                                                                                                                                                                                                                                                                                                                                                                                                                                                                                                                          | eEVA |
|----------|---------------|-----------|------------|--------------------------------------------------------------------------------------------------------------------------------------------------------------------------------------------------------------------------------------------------------------------------------------------------------------------------------------------------------------------------------------------------------------------------------------------------------------------------------------------------------------------------------------------------------------------------------------------------------------------------------------------------------------------------------------------------------------------------------------------------------------------------------------------------------------------|------|
| 10107934 | British (A)   | Female    | 2008-10-02 | [10107934]Met with ZZZZ to continue with psychology assessment re. potential to offer CBT for psychosis work. ZZZZ was keen to meet. She continues to present with strongly held beliefs about family members, phoneys and fakes and the people in the loft. ZZZZ continues to state that she does not get distressed by these experiences and has lived with them for years. She would like someone to investigate it properly and to understand and she feels rather exasperated that noone can do anything. She would rather they go away but understands they might not and she will have to continue living with these experiences. I asked if she felt these experiences were preventing her from living the life she would like. She said that apart from getting dressed in the dark she lives her life as |      |
| 10107876 | Caribbean (M) | Female    | 2008-10-04 | Thoughts : No evidence of suicidal ideation or thoguths of DSH or of harming others, no FTD, No TA, no evidence of psychosis or mania. Perceptions : No evidence of perceptual abnormalities. Cognition Grossly intact Insight Good insight into illness Impression Panic Disorder PLAN To be discharged from ED following medical clearance. To be referred to GP for followup regarding panic attacks to either commence patient on SSRIS citalopramfor panic attacks. GP to refer patietn for counsellign sessions & CBT if possible. Zopiclone 7.5 mg nocte prescribed for                                                                                                                                                                                                                                     |      |

Start CRIS - Search - Micro...

- Step 1: Records were searched for the terms ‘CBT’ and ‘Psychosis’ entered into free text case notes.
- Step 2: Ethnic category, sex, the date of relevant events and the text of the case themselves were brought back in the results table
